# Supplementary material for: Camel nanobody-based B7-H3 CAR-T cells show high efficacy against large solid tumours
Source: PubMed Central journal article supplement (PMC10517151; doi:10.1038/s41467-023-41631-w), 2023-09-22
Supplement: 41467_2023_41631_MOESM1_ESM.pdf [file 41467_2023_41631_MOESM1_ESM.pdf]

## **Camel nanobody-based B7-H3 CAR-T cells show high efficacy against large solid tumours**

Dan Li<sup>1</sup>, Ruixue Wang<sup>1</sup>, Tianyuzhou Liang<sup>1</sup>, Hua Ren<sup>1</sup>, Chaelee Park<sup>1</sup>, Chin-Hsien Tai<sup>1</sup>, Weiming Ni<sup>2</sup>, Jing Zhou<sup>2</sup>, Sean Mackay<sup>2</sup>, Elijah Edmondson<sup>3</sup>, Javed Khan<sup>4</sup>, Brad St Croix<sup>5</sup>, Mitchell Ho<sup>1</sup>

<sup>1</sup>*Laboratory of Molecular Biology, Center for Cancer Research, National Cancer Institute, Bethesda, Maryland 20892, USA*

<sup>2</sup>*IsoPlexis Corporation, Branford, Connecticut 06405, USA*

<sup>3</sup>*Molecular Histopathology Laboratory, Frederick National Laboratory for Cancer Research, Frederick, Maryland 21702, USA*

<sup>4</sup>*Genetics Branch, Center for Cancer Research, National Cancer Institute, Bethesda, Maryland 20892, USA*

<sup>5</sup>*Mouse Cancer Genetics Program, Center for Cancer Research, National Cancer Institute, Frederick, Maryland 21702, USA*

**Short Title:** Camel nanobody-based B7-H3 CAR-T cells

**\*Correspondence:** Mitchell Ho, Ph.D., Laboratory of Molecular Biology, National Cancer Institute, National Institutes of Health, 37 Convent Drive, Room 5002, Bethesda, MD 20892-4264, USA. Phone: (240) 760-7848; E-mail: homi@mail.nih.gov

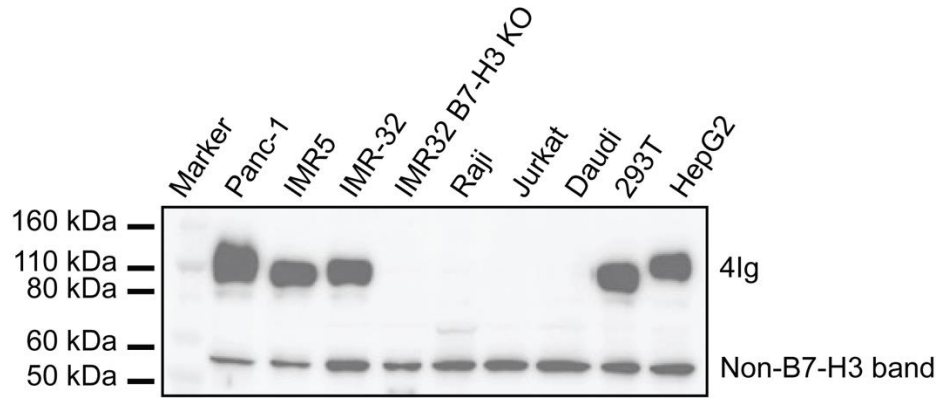

**Supplementary Fig. 1: Western blot of B7-H3 expression in B7-H3<sup>+</sup> and B7-H3<sup>-</sup> cell lysates using anti-B7-H3 mAb (Abcam; #ab226256).** Source data is provided as a Source Data file. *n* = 3 independent experiments.

|                | Signal peptide (1-28 aa)                                              | IgV (29-139 aa)  |     |
|----------------|-----------------------------------------------------------------------|------------------|-----|
| Mouse 2IgB7-H3 | MLRGWGGPSVGVCVRTALGVLCCLCTGAVEVQVSEDPVVALVDTTDLRCSFSPEPGFSL           |                  | 60  |
| Human 4IgB7-H3 | MLRRRGSPGMGVHVGAAALGALWFCLTGALVQVPEDPVVALVGTDTLCCSFSPEPGFSL           |                  | 60  |
| Human 2IgB7-H3 | MLRRRGSPGMGVHVGAAALGALWFCLTGALVQVPEDPVVALVGTDTLCCSFSPEPGFSL           |                  | 60  |
|                | *** .*. * : ** * : *** . * : ***** : ***** . ***** . ***** *****      |                  |     |
| Mouse 2IgB7-H3 | AQLNLIWQLTDTKQLVHSFTEGRDQGSAYSNRRTALFPDLLVQGNASLRLQVRVVTDEGSY         |                  | 120 |
| Human 4IgB7-H3 | AQLNLIWQLTDTKQLVHSFAEGQDQGSAYANRTALFPDLLAQGNASLRLQVRVADEGSF           |                  | 120 |
| Human 2IgB7-H3 | AQLNLIWQLTDTKQLVHSFAEGQDQGSAYANRTALFPDLLAQGNASLRLQVRVADEGSF           |                  | 120 |
|                | ***** : ** . ***** : ***** . ***** : ***** : ***** :                  |                  |     |
|                |                                                                       | IgC (145-238 aa) |     |
| Mouse 2IgB7-H3 | TCFVSIQDFDAAVSLQVAAPYSK-----                                          |                  | 144 |
| Human 4IgB7-H3 | TCFVSI <b>IRDFGSAAVSL</b> QVAAPYSKPSMTLEPNKDLRPGDVTITCSSYQGYPEAEVFWQD |                  | 180 |
| Human 2IgB7-H3 | TCFVSI <b>IRDFGSAAVSL</b> QVAAPYSK-----                               |                  | 144 |
|                | ***** . ** . *****                                                    |                  |     |
| Mouse 2IgB7-H3 | -----                                                                 |                  | 144 |
| Human 4IgB7-H3 | GQGVPLTGNVTTTSQMANEQGLFDVHSILRVVLGANGTYSCLVRNPVLQDDAHSSVTITPQ         |                  | 240 |
| Human 2IgB7-H3 | -----                                                                 |                  | 144 |
|                |                                                                       | IgV (243-357 aa) |     |
| Mouse 2IgB7-H3 | -----                                                                 |                  | 144 |
| Human 4IgB7-H3 | RSPTGAVEVQVPEDPVVALVGTDTLRCFSFSPEPGFSLAQLNLIWQLTDTKQLVHSFTEG          |                  | 300 |
| Human 2IgB7-H3 | -----                                                                 |                  | 144 |
| Mouse 2IgB7-H3 | -----                                                                 |                  | 144 |
| Human 4IgB7-H3 | RDQGSAYANRTALFPDLLAQGNASLRLQVRVADEGSFTCFVSI <b>IRDFGSAAVSL</b> QVAAPY |                  | 360 |
| Human 2IgB7-H3 | -----                                                                 |                  | 144 |
|                |                                                                       | IgC (363-456 aa) |     |
| Mouse 2IgB7-H3 | --PSMTLEPNKDLRPGNMVTITCSSYQGYPEAEVFWKDGQGVPLTGNVTTTSQMANERGLF         |                  | 202 |
| Human 4IgB7-H3 | SKPSMTLEPNKDLRPGDVTITCSSYRGYPEAEVFWQDGGQGVPLTGNVTTTSQMANEQGLF         |                  | 420 |
| Human 2IgB7-H3 | --PSMTLEPNKDLRPGDVTITCSSYRGYPEAEVFWQDGGQGVPLTGNVTTTSQMANEQGLF         |                  | 202 |
|                | ***** : ***** . ***** : ***** . ***** . ***** . *****                 |                  |     |
| Mouse 2IgB7-H3 | DVHSVLRVVLGANGTYSCLVRNPVLQDDAHGSVTIT                                  | 238              |     |
| Human 4IgB7-H3 | DVHSVLRVVLGANGTYSCLVRNPVLQDDAHGSVTIT                                  | 456              |     |
| Human 2IgB7-H3 | DVHSVLRVVLGANGTYSCLVRNPVLQDDAHGSVTIT                                  | 238              |     |
|                | *****                                                                 |                  |     |

**Supplementary Fig. 2: Sequence alignment of the ectodomain of human 4IgB7-H3, human 2IgB7-H3, and mouse 2IgB7-H3.** The leader peptide is indicated by a black solid line; IgV- and IgC-like domains are indicated by red and green lines. The sequence of peptide #10 (QVRVADEGSFTCFVSIR) and peptide #11 (SFTCFVSI**IRDFGSAAVSL**) was highlighted in yellow. The conserved residues are marked with asterisks (\*), the residues with similar properties between variants are marked with colons (:), and the residues with marginally similar properties are marked with periods(.).

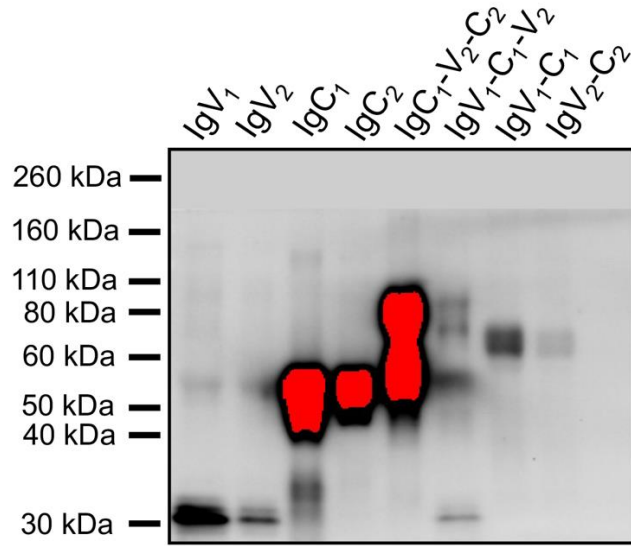

**Supplementary Fig. 3: Western blot to examine the interaction between C4-Fc and individual 4Ig fragments.** This is the same membrane shown in Fig. 3d with a long exposure of 2 min.  $n = 3$  independent experiments.

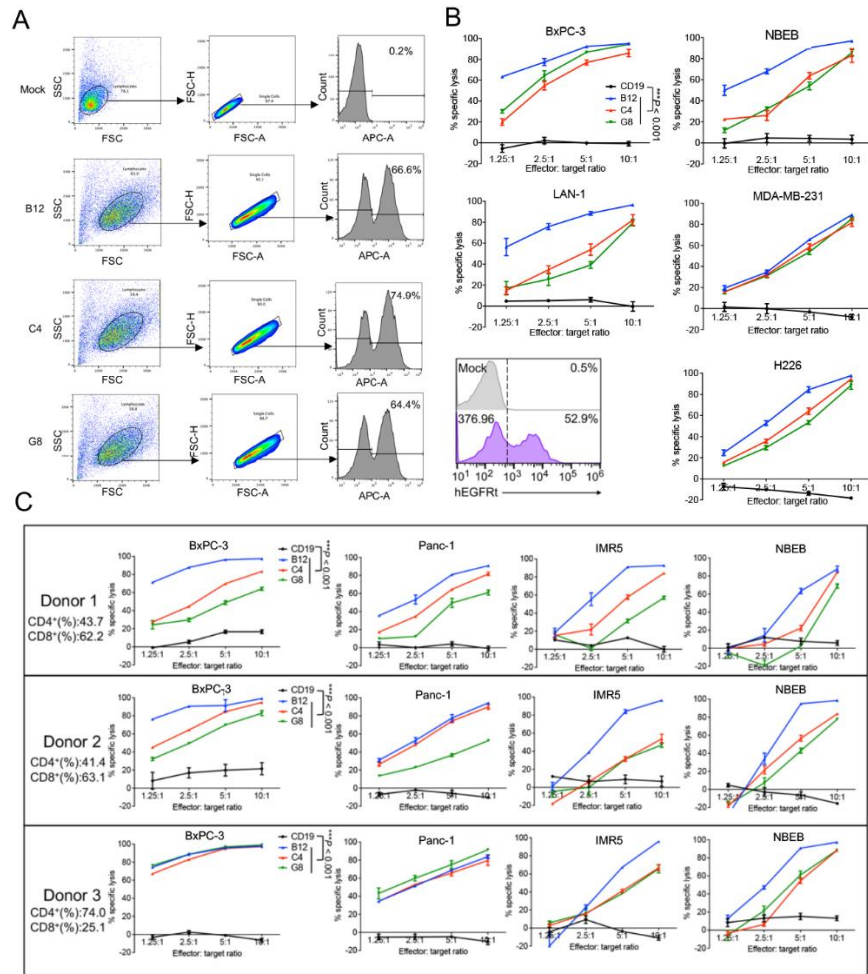

**Supplementary Fig. 4: B7-H3-specific nanobody-based CAR-T cells effectively lysed human solid tumor cells *in vitro*.** (A) The transduction efficiency of B7-H3 CAR in T cells was examined by hEGFRt expression, including B12(V<sub>H</sub>H)-CAR-T, C4(V<sub>H</sub>H)-CAR-T, G8(V<sub>H</sub>H)-CAR-T, and 376.96(scFv)-CAR-T. Non-transduced T cell was the mock control. (B) Cytolytic activity of B7-H3 nanobody-based CAR-T cells to a human PDAC cell line BxPC-3, two NB cell lines (NBEB and LAN-1), a TNBC cell line (MDA-MB-231), and a LUAD cell line (H226) at various E/T ratios for 24 hours incubation.  $n = 3$  independent experiments. Values represent mean  $\pm$  SEM.  $***P < 0.001$ , two-tailed unpaired Student's  $t$  test. (C) Cytolytic activity of three healthy donors-derived B7-H3 nanobody-based CAR-T cells to various tumor cell lines (BxPC-3, Panc-1, IMR5, and NBEB) at various E/T ratios for 24 hours incubation. The percentages of CD4<sup>+</sup> and CD8<sup>+</sup> CAR-T cells were shown from each donor. The killing data was harvested from three independent experiments. Values represent mean  $\pm$  SEM.  $***P < 0.001$ , two-tailed unpaired Student's  $t$  test. Source data is provided as a Source Data file.

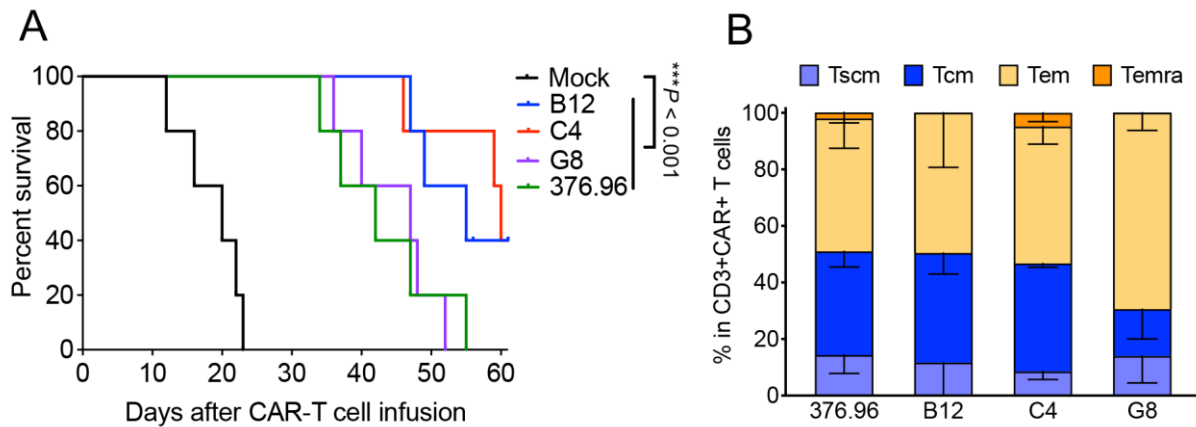

**Supplementary Fig. 5: Mice survival and phenotype of circulated B7-H3 CAR-T cells in the CAR-T treated Panc-1-bearing mice.** (A) Kaplan-Meier survival curve of mice infused with 5 million B7-H3 CAR-T cells and mock-T cells.  $n = 5$  mice/group. \*\*\* $P < 0.001$ , Log-rank test. (B) Relative proportion of stem cell-like memory (Tscm), central memory (Tcm), effector memory (Tem), and terminally differentiated effector memory (Temra) subsets in circulated CD3<sup>+</sup>CAR<sup>+</sup>-T cell subpopulations at week 2 in the 2.5 million CAR-T infusion experiment. Statistical analyses are shown from more than three individual samples. Values represent mean  $\pm$  SEM.  $n = 3$  individual sample/group. Source data is provided as a Source Data file.

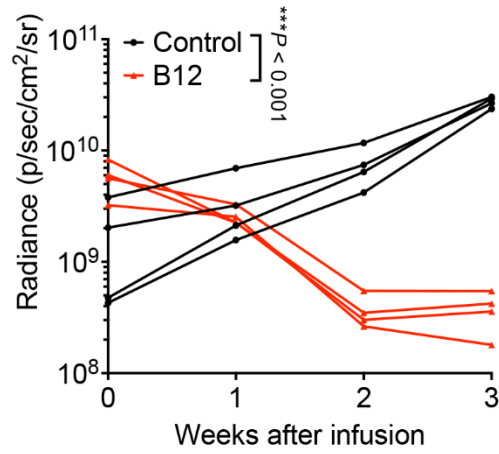

**Supplementary Fig. 6: The tumor growth curve of orthotopic Panc-1 tumors in the treatment of B12(V<sub>H</sub>H)-CAR-T cells shown in Fig. 5o.  $n = 4$  mice/group. Values represent mean  $\pm$  SEM.  $***P < 0.001$ , two-tailed unpaired Student's  $t$  test. Source data is provided as a Source Data file.**

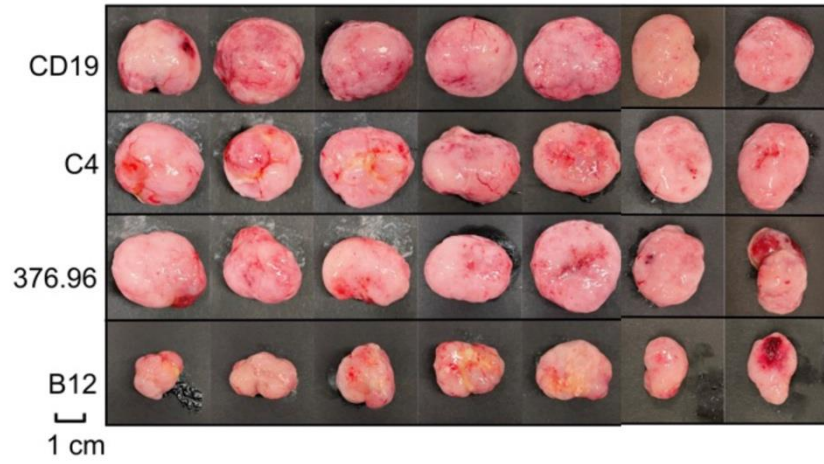

**Supplementary Fig. 7: The sizes of NBEb tumors in individual mice from CD19 CAR-T cells and B7-H3 CAR-T cells at the end of the study.**



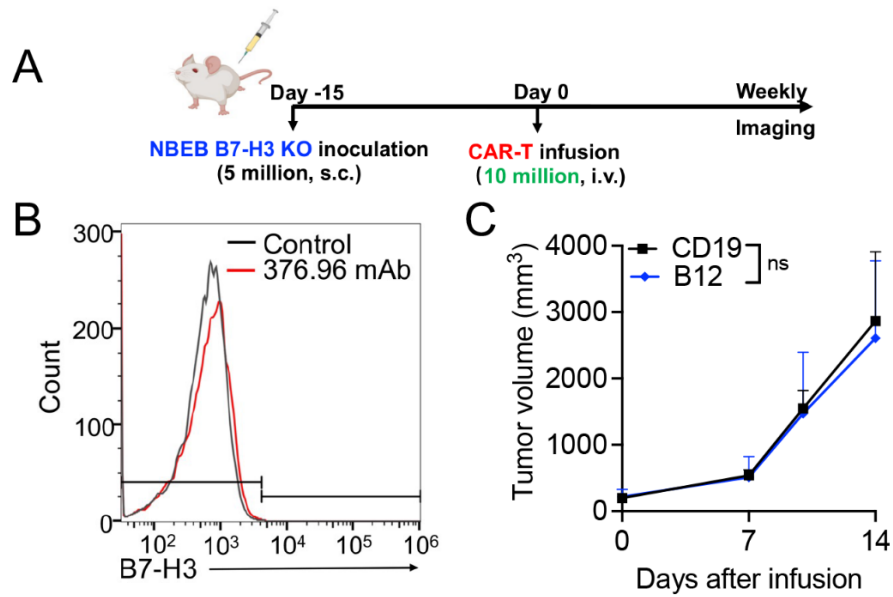

**Supplementary Fig. 8: B12(V<sub>H</sub>H)-CAR-T cells could not inhibit tumor growth in the NBEB B7-H3 knockout (KO) mouse model.** (A) Experimental schema of the subcutaneous (s.c.) NBEB B7-H3 KO mouse model (created with BioRender.com). NBEB B7-H3 KO tumor-bearing NSG mice were i.v. infused with 10 million B12(V<sub>H</sub>H)-CAR-T cells or an equivalent number of CD19 CAR-T cells after 15 days of tumor inoculation.  $n = 4$  mice/group. (B) Cell surface B7-H3 expression on NBEB B7-H3 KO cells is shown as histograms with the control unstained. The 376.96 mAb was used to examine the expression of B7-H3 on cells. (C) The respective tumor growth curves of two mice groups infused with CAR-T cells. ns, not significant, two-tailed unpaired Student's  $t$  test.  $n = 4$  mice/group. Values represent mean  $\pm$  SEM. Source data is provided as a Source Data file.

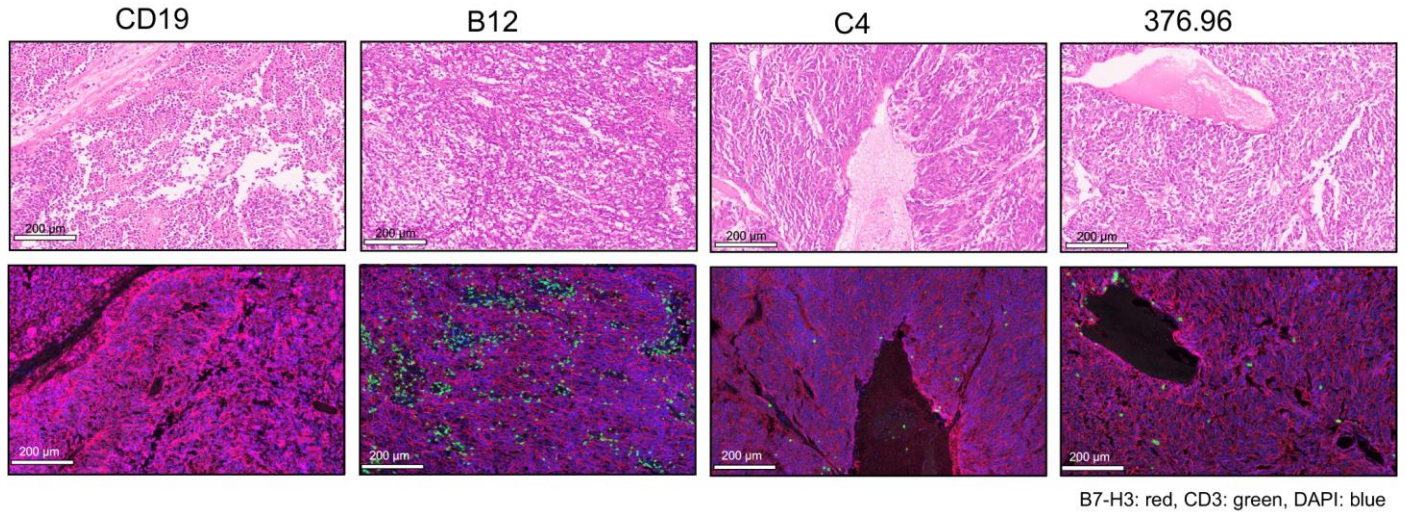

**Supplementary Fig. 9: CAR-T cells infiltration in NBEB tumor tissues.** The same tumor tissue staining was shown in Figure 6j but with a scale bar of 200 μm.  $n = 3$  independent experiments.

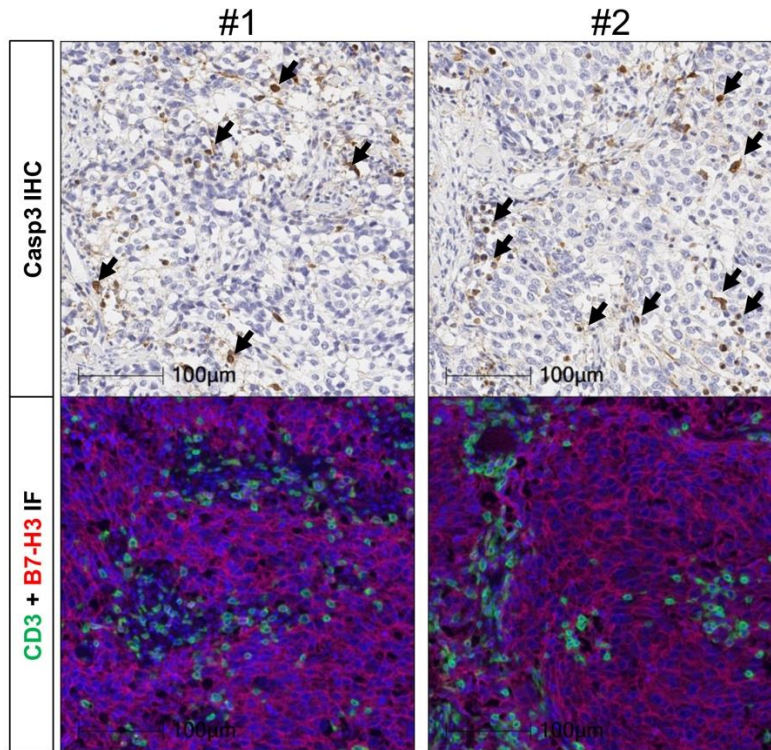

**Supplementary Fig. 10: Colocalization of increased apoptotic cells (arrow) stained by Caspase-3 (IHC) and infiltrated B12(V<sub>H</sub>H)-CAR-T cells in the NBEB tumor tissues.** Two distinct areas (#1 and #2) displaying tumor-infiltrated CAR-T cells were observed. The microscopic examination areas for Caspase-3 IHC staining and CD3+B7-H3 immunofluorescence (IF) staining were precisely matched with each other. Scale bar, 100 μm. *n* = 3 independent experiments.

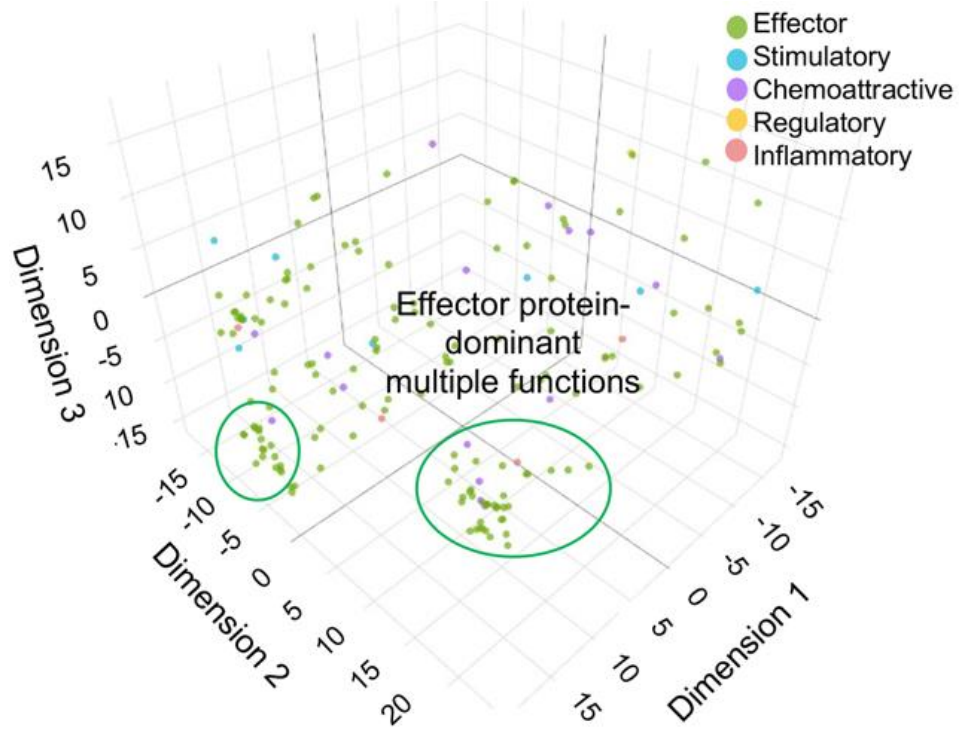

**Supplementary Fig. 11: The t-distributed stochastic neighbor embedding (tSNE) plots.** The cytokine/chemokines released from polyfunctional long-persistent CD4<sup>+</sup> B7-H3 CAR-T cells mainly belonged to the effector subgroup using a 32-plex panel polyfunctionality capture platform.

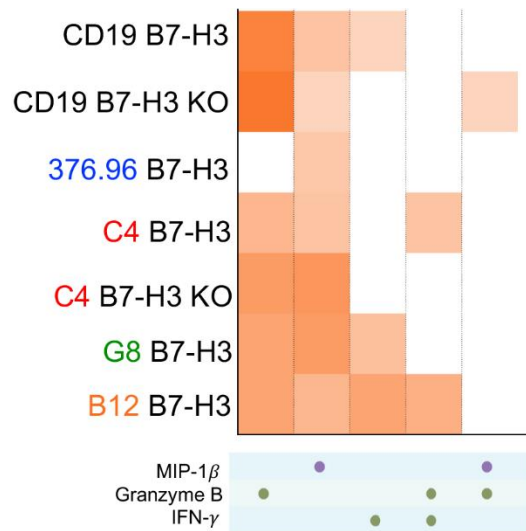

color indicates percentage of sample secreting the specified combination of cytokines:

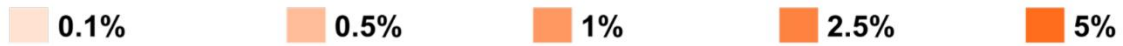

**Supplementary Fig. 12: Polyfunctional heat map displaying major function cytokines/chemokines secreted across long-persistent CD8<sup>+</sup> B7-H3 CAR-T cells upon IMR32 and IMR32 B7-H3 KO stimulation from Fig. 7a.**

**Supplementary Table 1: The amino acid sequences of B12, C4, and G8 V<sub>H</sub>Hs.**

| <b>Name</b>             | <b>Sequence</b>                                                                                                                             | <b>Patent Application</b> |
|-------------------------|---------------------------------------------------------------------------------------------------------------------------------------------|---------------------------|
| B12<br>V <sub>H</sub> H | QVQLVESGGGSVQVGGSLRLSCAASGFTYNSYSVGWFRQA<br>PGKEREGVAAINSGGSSTYYAASVKGRFTISRDNKNTVYL<br>QMNSLKPEDTAMYYCAARSPSPLTFQRTLREDSYNYWGQ<br>GTQVTVSS | PCT/US202<br>0/056601     |
| C4<br>V <sub>H</sub> H  | EVQLVESGGGSVQAGGSLRLSCVASEDSTSAMCMGWFRQA<br>PGKEREGVACINPTGEVTWYGDSVKGRFTISRDTVKKIVYL<br>QMNSLKPEDTAMYYCAARVITYGGDWSTDTDYEYWGQGT<br>QVTVSS  | PCT/US202<br>0/056601     |
| G8<br>V <sub>H</sub> H  | DVQLVESGGGLVQPGGSLRLSCAASGFTFSRYWMGWFRQA<br>PGKGVVEWVSTINSGGGSTYYADSVKGRFTISRDNKNTLYL<br>QLNNLKTEDTAMYYCAKEQWRTGSRGQGTQVTVSS                | PCT/US202<br>0/056601     |

**Supplementary Table 2: List of 32 genes significantly enriched in low and high polyfunctionality subsets of B12(V<sub>H</sub>H)-CAR-T cells.** The DESeq2, and R library, was used for the differential expression analysis test.

| <b>Gene</b>   | <b>Base Mean</b> | <b>Log2 Fold Change</b> | <b>P Value</b> | <b>Functional Cluster</b> | <b>Major Function</b>                                               |
|---------------|------------------|-------------------------|----------------|---------------------------|---------------------------------------------------------------------|
| <i>EPRS1</i>  | 1                | -0.45                   | 0.011888       | <b>High</b>               | Peptide chain elongation                                            |
| <i>ATP5PB</i> | 0.8              | -0.42                   | 0.018614       | <b>High</b>               | ATP synthesis                                                       |
| <i>TUBA1C</i> | 1.2              | -0.41                   | 0.023464       | <b>High</b>               | Cytoskeleton organization                                           |
| <i>RBM39</i>  | 1.4              | -0.41                   | 0.023889       | <b>High</b>               | mRNA splicing/transcriptional coactivator                           |
| <i>EIF1AX</i> | 1.3              | -0.37                   | 0.038974       | <b>High</b>               | Translation initiation                                              |
| <i>AGO3</i>   | 0.6              | -0.37                   | 0.030522       | <b>High</b>               | Transcription repression                                            |
| <i>MRPL52</i> | 1.2              | -0.37                   | 0.041478       | <b>High</b>               | Mitochondrial translation                                           |
| <i>CBWD1</i>  | 0.5              | -0.36                   | 0.033645       | <b>High</b>               | ATP binding                                                         |
| <i>KRT10</i>  | 0.5              | -0.34                   | 0.049954       | <b>High</b>               | Keratinization                                                      |
| <i>FTX</i>    | 0.4              | -0.32                   | 0.048403       | <b>High</b>               | X-inactivation                                                      |
| <i>CHST12</i> | 1.8              | 0.58                    | 0.00124        | <b>Low</b>                | Sulfate transfer (metabolism)                                       |
| <i>NDUFA1</i> | 1.9              | 0.48                    | 0.004035       | <b>Low</b>                | Electron transfer from NADH to the respiratory chain                |
| <i>NDUFS7</i> | 0.7              | 0.44                    | 0.014092       | <b>Low</b>                | Electron transfer from NADH to the respiratory chain                |
| <i>MFSD4B</i> | 0.4              | 0.39                    | 0.01999        | <b>Low</b>                | Glucose transporter                                                 |
| <i>ACTG1</i>  | 2.7              | 0.38                    | 0.01443        | <b>Low</b>                | Cell motility                                                       |
| <i>YWHAB</i>  | 1.7              | 0.37                    | 0.030401       | <b>Low</b>                | Signal transduction by binding to phosphoserine-containing proteins |
| <i>JPX</i>    | 0.7              | 0.37                    | 0.038301       | <b>Low</b>                | X-inactivation                                                      |
| <i>TCEAL4</i> | 0.7              | 0.37                    | 0.041          | <b>Low</b>                | Transcription elongation                                            |

|                 |      |      |          |            |                                                                                                                            |
|-----------------|------|------|----------|------------|----------------------------------------------------------------------------------------------------------------------------|
| <i>C19orf53</i> | 1.5  | 0.36 | 0.040371 | <b>Low</b> | Undecided but diseases associated with C19orf53 include Leydig Cell Tumor                                                  |
| <i>RPL26L1</i>  | 0.7  | 0.36 | 0.042514 | <b>Low</b> | Peptide chain elongation                                                                                                   |
| <i>MRPS16</i>   | 0.9  | 0.36 | 0.043855 | <b>Low</b> | Protein synthesis within the mitochondrion                                                                                 |
| <i>CSE1L</i>    | 0.6  | 0.35 | 0.04865  | <b>Low</b> | Export receptor for importin-alpha from nucleus to cytoplasm                                                               |
| <i>PPIB</i>     | 2    | 0.35 | 0.032289 | <b>Low</b> | Collagen formation                                                                                                         |
| <i>STMN1</i>    | 3.5  | 0.34 | 0.016097 | <b>Low</b> | Regulation of the microtubule filament system by destabilizing microtubules                                                |
| <i>RPL30</i>    | 6.7  | 0.33 | 0.005861 | <b>Low</b> | Peptide chain elongation                                                                                                   |
| <i>RAN</i>      | 3.5  | 0.31 | 0.031645 | <b>Low</b> | Translocation of RNA and proteins through the nuclear pore complex and control of DNA synthesis and cell cycle progression |
| <i>COX7A2</i>   | 4.3  | 0.29 | 0.031153 | <b>Low</b> | Electron transfer from reduced cytochrome c to oxygen                                                                      |
| <i>CHCHD2</i>   | 4.7  | 0.29 | 0.027479 | <b>Low</b> | Peroxisomal lipid metabolism                                                                                               |
| <i>RPL34</i>    | 10.2 | 0.25 | 0.011286 | <b>Low</b> | Peptide chain elongation                                                                                                   |
| <i>RPS27</i>    | 15.6 | 0.18 | 0.034877 | <b>Low</b> | Peptide chain elongation and DNA repair as well as oncogenesis                                                             |
| <i>RPL35</i>    | 15.7 | 0.18 | 0.03556  | <b>Low</b> | Peptide chain elongation                                                                                                   |
| <i>RPS18</i>    | 36.3 | 0.14 | 0.032758 | <b>Low</b> | Peptide chain elongation                                                                                                   |



**Supplementary Table 3: Reactome pathway analysis of genes that are significantly enriched in low and high polyfunctionality subsets of B12(V<sub>H</sub>H)-CAR-T cells.** A hypergeometric distribution test, which is corrected for false discovery rate using the Benjamani-Hochberg method, was performed in this study.

| <b>Gene Pathway</b>                                                              | <b>P value</b> | <b>Genes</b>               |
|----------------------------------------------------------------------------------|----------------|----------------------------|
| Translation                                                                      | 0.002311816    | <i>MRPL52;EPRS1;EIF1AX</i> |
| Formation of the cornified envelope                                              | 0.006374501    | <i>KRT10</i>               |
| Post-transcriptional silencing by small RNAs                                     | 0.006624202    | <i>AGO3</i>                |
| Competing endogenous RNAs (ceRNAs) regulate PTEN translation                     | 0.007567253    | <i>AGO3</i>                |
| Regulation of PTEN mRNA translation                                              | 0.00850949     | <i>AGO3</i>                |
| Small interfering RNA (siRNA) biogenesis                                         | 0.00850949     | <i>AGO3</i>                |
| Regulation of RUNX1 Expression and Activity                                      | 0.01601816     | <i>AGO3</i>                |
| Formation of ATP by chemiosmotic coupling                                        | 0.0169531      | <i>ATP5PB</i>              |
| Keratinization                                                                   | 0.017234755    | <i>KRT10</i>               |
| Microtubule-dependent trafficking of connexons from Golgi to the plasma membrane | 0.018820558    | <i>TUBA1C</i>              |
| Transport of connexons to the plasma membrane                                    | 0.019753076    | <i>TUBA1C</i>              |
| Post-chaperonin tubulin folding pathway                                          | 0.021615697    | <i>TUBA1C</i>              |
| Cytosolic tRNA aminoacylation                                                    | 0.022545801    | <i>EPRS1</i>               |
| MicroRNA (miRNA) biogenesis                                                      | 0.022545801    | <i>AGO3</i>                |
| Formation of tubulin folding intermediates by CCT/TriC                           | 0.024403597    | <i>TUBA1C</i>              |
| Prefoldin mediated transfer of substrate to CCT/TriC                             | 0.026258182    | <i>TUBA1C</i>              |
| Activation of AMPK downstream of NMDARs                                          | 0.027184272    | <i>TUBA1C</i>              |
| Cristae formation                                                                | 0.029034051    | <i>ATP5PB</i>              |
| Regulation of MECP2 expression and activity                                      | 0.029957741    | <i>AGO3</i>                |
| RHO GTPases activate IQGAPs                                                      | 0.029957741    | <i>TUBA1C</i>              |

|                                                                                   |             |                      |
|-----------------------------------------------------------------------------------|-------------|----------------------|
| Sealing of the nuclear envelope (NE) by ESCRT-III                                 | 0.029957741 | <i>TUBA1C</i>        |
| Cooperation of Prefoldin and TriC/CCT in actin and tubulin folding                | 0.030880631 | <i>TUBA1C</i>        |
| Organelle biogenesis and maintenance                                              | 0.031168556 | <i>TUBA1C;ATP5PB</i> |
| Oncogene Induced Senescence                                                       | 0.031802724 | <i>AGO3</i>          |
| NR1H3 & NR1H2 regulate gene expression linked to cholesterol transport and efflux | 0.035483124 | <i>AGO3</i>          |
| Gap junction assembly                                                             | 0.035483124 | <i>TUBA1C</i>        |
| Transcriptional Regulation by VENTX                                               | 0.036401234 | <i>AGO3</i>          |
| tRNA Aminoacylation                                                               | 0.039150801 | <i>EPRSI</i>         |
| tRNA modification in the nucleus and cytosol                                      | 0.040065737 | <i>EPRSI</i>         |
| Aggrephagy                                                                        | 0.040979881 | <i>TUBA1C</i>        |
| Assembly and cell surface presentation of NMDA receptors                          | 0.040979881 | <i>TUBA1C</i>        |
| Carboxyterminal post-translational modifications of tubulin                       | 0.042805795 | <i>TUBA1C</i>        |
| NR1H2 and NR1H3-mediated signaling                                                | 0.044628548 | <i>AGO3</i>          |
| Gap junction trafficking                                                          | 0.045538741 | <i>TUBA1C</i>        |
| Recycling pathway of L1                                                           | 0.045538741 | <i>TUBA1C</i>        |
| Gap junction trafficking and regulation                                           | 0.047356762 | <i>TUBA1C</i>        |
| Formation of the ternary complex, and subsequently, the 43S complex               | 0.048264591 | <i>EIFIAX</i>        |
| COPI-independent Golgi-to-ER retrograde traffic                                   | 0.049171634 | <i>TUBA1C</i>        |
| Intraflagellar transport                                                          | 0.050077891 | <i>TUBA1C</i>        |

**Supplementary Table 4: Antibody information in this study.**

| <b>Antibodies</b>                                             | <b>Source</b>             | <b>Identifier</b> | <b>Dilution</b> | <b>Application</b>                |
|---------------------------------------------------------------|---------------------------|-------------------|-----------------|-----------------------------------|
| B12                                                           | This study                | N/A               | 1-10 µg/ml      | ELSIA/Flow cytometry/Western blot |
| C4                                                            | This study                | N/A               | 1-10 µg/ml      | ELSIA/Flow cytometry/Western blot |
| G8                                                            | This study                | N/A               | 1-10 µg/ml      | ELSIA/Flow cytometry/Western blot |
| Anti-B7-H3 mAb                                                | Abcam                     | ab226256          | 1:1000          | Western blot                      |
| Anti-B7-H3 mAb                                                | Cell Signaling Technology | 14058             | 1:1000          | Western blot                      |
| Anti-B7-H3 mAb, clone 376.96                                  | Millipore Sigma           | MABC1731-100UL    | 1-5 µg/ml       | ELSIA/Flow cytometry/Western blot |
| Recombinant humanized anti-human CD276 antibody, clone MGA271 | Creative Biolabs          | TAB-117CL         | 1 µg/ml         | Flow cytometry                    |
| Rabbit anti-human GAPDH                                       | Cell Signaling Technology | 2118              | 1:1000          | Western blot                      |
| BV711-conjugated CD3                                          | BioLegend                 | 300464            | 5 µg/sample     | Flow cytometry                    |
| FITC-conjugated anti-CD8                                      | BioLegend                 | 344704            | 5 µg/sample     | Flow cytometry                    |
| APC/Cy7-conjugated anti-CD4                                   | BioLegend                 | 317417            | 5 µg/sample     | Flow cytometry                    |
| APC-conjugated anti-PD1                                       | BioLegend                 | 329908            | 5 µg/sample     | Flow cytometry                    |
| APC-conjugated anti-LAG3                                      | Thermo Fisher Scientific  | 17-2239-41        | 5 µg/sample     | Flow cytometry                    |
| APC-conjugated anti-CD62L                                     | BioLegend                 | 304809            | 5 µg/sample     | Flow cytometry                    |
| BV421-conjugated anti-TIM3                                    | BioLegend                 | 345007            | 5 µg/sample     | Flow cytometry                    |
| BV421-conjugated anti-CD45RA                                  | BioLegend                 | 304130            | 5 µg/sample     | Flow cytometry                    |
| PE-conjugated anti-CD95                                       | BioLegend                 | 305608            | 5 µg/sample     | Flow cytometry                    |
| PE-conjugated anti-PD-1                                       | Thermo Fisher Scientific  | 12-2799-42        | 5 µg/sample     | Flow cytometry                    |

|                                                         |                           |               |             |                |
|---------------------------------------------------------|---------------------------|---------------|-------------|----------------|
| PE-conjugated anti-TIM-3                                | Thermo Fisher Scientific  | 12-3109-42    | 5 µg/sample | Flow cytometry |
| PE-conjugated anti-LAG-3                                | Thermo Fisher Scientific  | 12-2239-41    | 5 µg/sample | Flow cytometry |
| Cleaved Caspase-3                                       | Cell Signaling Technology | 9661          | 1:500       | Western blot   |
| PE-conjugated goat anti-mouse IgG                       | Jackson ImmunoResearch    | 115-116-072   | 1:500       | Flow cytometry |
| APC-conjugated goat anti-mouse IgG                      | Jackson ImmunoResearch    | 115-136-072   | 1:200       | Flow cytometry |
| PE-conjugated goat anti-human IgG                       | Jackson ImmunoResearch    | 109-116-097   | 1:200       | Flow cytometry |
| Alexa Fluor 488-conjugated goat-anti-human IgG          | Jackson ImmunoResearch    | 109-545-003   | 1:200       | Flow cytometry |
| HRP-conjugated goat anti-human IgG                      | Jackson ImmunoResearch    | 109-035-008   | 1:5000      | Western blot   |
| HRP-conjugated goat anti-mouse IgG                      | Jackson ImmunoResearch    | 115-035-008   | 1:5000      | Western blot   |
| APC-conjugated - anti-FLAG                              | Biolegend                 | 637308        | 1:100       | Flow cytometry |
| HRP-conjugated mouse anti-M13                           | GE Healthcare             | Discontinued  | 1:5000      | ELISA          |
| HRP-conjugated mouse anti-M13                           | SinoBiological            | 11973-MM05T-H | 1:5000      | ELISA          |
| HRP-conjugated mouse anti-His                           | GenScript                 | A00612        | 1:3000      | ELISA          |
| Anti-EGFR human monoclonal antibody cetuximab (Erbixux) | Eli Lilly                 | N/A           | 1 µg/ml     | Flow cytometry |

**Supplementary Table 5: The amino acid sequence of the 4IgB7-H3 peptides. Each peptide is 18 amino acids long and has 9 overlapped amino acids with adjacent peptides.**

| Name       | Sequence            | Name       | Sequence            |
|------------|---------------------|------------|---------------------|
| peptide 1  | LEVQVPEDPVVALVGTDA  | peptide 19 | TTSQMANEQGLFDVHSIL  |
| peptide 2  | VVALVGTDATLCCSF SPE | peptide 20 | GLFDVHSILRVVLGANGT  |
| peptide 3  | TLCCSF SPEPGFSLAQLN | peptide 21 | RVVLGANGTY SCLVRNPV |
| peptide 4  | PGFSLAQLNLIWQLTDTK  | peptide 22 | YSCLVRNPVLQQDAHSSV  |
| peptide 5  | LIWQLTDTKQLVHSFAEG  | peptide 23 | LQQDAHSSVTITPQRSPT  |
| peptide 6  | QLVHSFAEGQDQGSAYAN  | peptide 24 | TITPQRSPTGAVEVQVPE  |
| peptide 7  | QDQGSAYANRTALFPDLL  | peptide 25 | GAVEVQVPEDPVVALVGT  |
| peptide 8  | RTALFPDLLAQGNASLRL  | peptide 26 | DPVVALVGTDATLRCSFS  |
| peptide 9  | AQGNASLRLQVRVADEG   | peptide 27 | DATLRCSFSPEPGFSLAQ  |
| peptide 10 | QVRVADEGSFTCFVSIR   | peptide 28 | LNLIWQLTDTKQLVHSFT  |
| peptide 11 | SFTCFVSIRDFGSAAVSL  | peptide 29 | TKQLVHSFTEGRDQGSAY  |
| peptide 12 | DFGSAAVSLQVAAPYSKP  | peptide 30 | KDLRPGDTVITICSSYRG  |
| peptide 13 | QVAAPYSKPSMTLEPNKD  | peptide 31 | TITCSSYRGYPEAEVFWQ  |
| peptide 14 | SMTLEPNKDLRPGDTVITI | peptide 32 | EQGLFDVHSVLRVVLGAN  |
| peptide 15 | LRPGDTVITICSSYQGY P | peptide 33 | GTYSCLVRNPVLQQDAHG  |
| peptide 16 | TCSSYQGYPEAEVFWQDG  | peptide 34 | PVLQQDAHGSVTITGQPM  |
| peptide 17 | EAEVFWQDGQGVPLTGNV  | peptide 35 | SVTITGQPMTFPPEA     |
| peptide 18 | QGVPLTGNVTTSQMANEQ  |            |                     |

**Supplementary Table 6: Sequences of primers used for B7-H3 and  $\beta$ -actin amplifications.**

| Name                         | Sequence (5' to 3')  |
|------------------------------|----------------------|
| Human B7-H3-forward          | GTGGTTCTGCCTCACAGGAG |
| Human B7-H3-reverse          | ACCAGCAGTGCAATGAGACA |
| Human $\beta$ -actin-forward | CACCAACTGGGACGACAT   |
| Human $\beta$ -actin-reverse | ACAGCCTGGATAGCAACG   |
